# Supplementary material
Source: publisher site journal article supplement (https://www.dovepress.com/get_supplementary_file.php?f=242021.docx)
Supplement: Supplementary file 1 [file get_supplementary_file.php]

**supplementary figures**

**Supplementary Figure 1**. The percentage of children who tolerate the formula over the time by formula type.


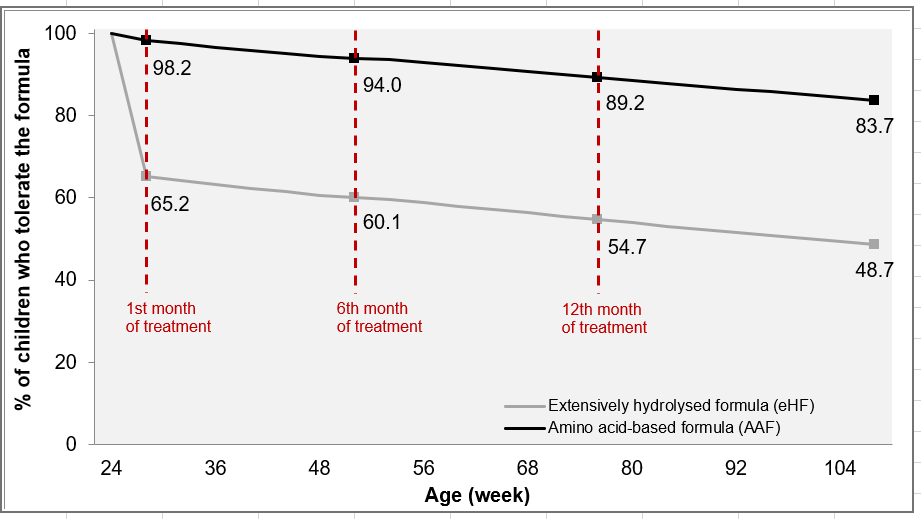


**Notes:** The figure represents the percentage of children with CPMA who can tolerate formula over time in amino acid-based formula and extensively hydrolysed formula scenarios

**Abbreviations:** AAF: amino acid-based formula; eHF: extensively hydrolysed formula.

**Supplementary Figure 2**. The possibility of being cost advantageous regarding maximum willingness to pay (Euro) per additional child who tolerates the formula at the end of the 24th month.


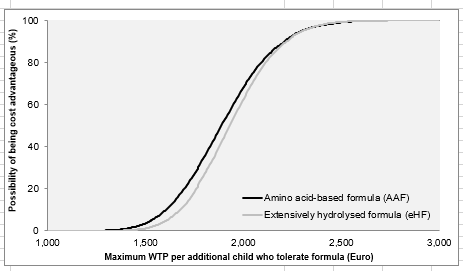


**Abbreviation:** WTP: willingness to pay.
